# Supplementary material for: A novel glycosylated anti-CD20 monoclonal antibody from transgenic cattle
Source: PubMed Central journal article supplement (PMC6123398; doi:10.1038/s41598-018-31417-2), 2018-09-04

## **A novel glycosylated anti-CD20 monoclonal antibody from transgenic cattle**

Ran Zhang<sup>1</sup>, Chenjun Tang<sup>1</sup>, Huaizu Guo<sup>2</sup>, Bo Tang<sup>3</sup>, Sheng Hou<sup>2</sup>, Lei Zhao<sup>4</sup>, Jianwu Wang<sup>3</sup>, Fangrong Ding<sup>1</sup>, Jianmin Zhao<sup>3</sup>, Haiping Wang<sup>1</sup>, Zhongzhou Chen<sup>1</sup>, Yunping Dai<sup>1\*</sup>, Ning Li<sup>1\*</sup>

<sup>1</sup>State Key Laboratory for Agrobiotechnology, College of Biological Sciences, China Agricultural University, Beijing 100194, China

<sup>2</sup>State Key Laboratory of Antibody Medicine and Targeted Therapy, Shanghai Key Laboratory of Cell Engineering; Shanghai 200433, China

<sup>3</sup>Wuxi KGBIO biotechnology Limited Liability Company, Wuxi 214145, China

<sup>4</sup>National Clinical Research Center for Normal Aging and Geriatric, Institute of Geriatric, PLA General Hospital, Beijing 100853, China

Correspondence and requests for materials should be addressed to Y.D. (email: daiyunping@sina.com) or N.L. (email: ninglcau@126.com)

**Figure S1** Verification of transgene integration. (a) Image of transgenic cattle expressing the recombinant anti-CD20 mAb at the farm. (b) PCR detection of the integration sites. The product for the wild-type sequence was 671 bp, whereas the product for the 3' flanking region of the transgenic sequence was 405 bp. (c, d) Detection of the transgene location in the transgenic cattle by the GTG-binding pattern of metaphase spreads before hybridization (c) and the same metaphase spreads after FISH (d). The arrows indicate the transgene integration site in chromosome 3.

**Figure S2** Verification of the transgene genetic stability of transgenic offspring. (a) PCR detection of the transgenes in transgenic offspring. Marker, 1-kb DNA ladder; P-LC, positive plasmid containing the LC-encoding sequences; P-HC, positive plasmid containing the HC-encoding sequences; WT, genomic DNA of wild-type cattle; genomic DNA of transgenic cattle indicated by 1321, 1325 and 0220. The amplified products for the HC- or LC-encoding sequences were 1.5 kb and 0.8 kb, respectively. (b, c) Expression of the recombinant anti-CD20 mAb in the milk of transgenic offspring, as characterized by SDS-PAGE (b) and western blotting under reducing conditions (c). WT, milk from wild-type cattle. PC, purified human IgG.

**Figure S3** Peptide mapping of the HC of the recombinant anti-CD20 mAb and Rituxan. Peptide sequences highlighted in red indicate the allotype of the recombinant mAb. The dashes represent amino acids that are identical to those of Rituxan.

**Figure S4** SPR analysis of the binding affinity of the recombinant anti-CD20 mAb to human Fc $\gamma$ RIIIa. The sensorgrams obtained for the surface blank and buffer blank control were subtracted from the sensorgrams obtained for the antibodies to yield the

curves shown here. (a, b) Interaction between the recombinant anti-CD20 mAb and FcγRIIIa-Phe158 (a) or FcγRIIIa-Val158 (b). The concentrations of the recombinant anti-CD20 mAb are 3.333, 10, 30, 90, 270, and 810 nM, as indicated. (c, d) Interaction between Rituxan and FcγRIIIa-Phe158 (c) or FcγRIIIa-Val158 (d). The concentrations of Rituxan are 30, 90, 270, 810, 2430, 7,290, and 21,870 nM, as indicated.

**Table S1. The whole N-glycan profiles of recombinant anti-CD20 mAb.**

| Milk mAb |                  |                      |                                                                                     |                    |                    |                     |           |
|----------|------------------|----------------------|-------------------------------------------------------------------------------------|--------------------|--------------------|---------------------|-----------|
| RT (min) | Short name       | Composition          | Structura scheme                                                                    | Expected mass (Da) | Observed mass (Da) | $\Delta$ mass (ppm) | FLR Area% |
| 15.09    | <b>G0-GlcNAc</b> | Hex3HexNAc3          |    | 1234.4832          | 1234.478           | -4.21               | 0.13      |
| 18.56    | <b>G0</b>        | Hex3HexNAc4          |    | 1437.5625          | 1437.558           | -3.13               | 0.53      |
| 18.83    | /                | Hex5HexNAc2          | /                                                                                   | 1355.5095          | 1355.234           | -203.29             | 0.19      |
| 20.52    | <b>G1-GlcNAc</b> | Hex4HexNAc4          |    | 1396.5360          | 1396.537           | 0.72                | 0.94      |
| 21.00    | <b>G0F</b>       | Hex3HexNAc4<br>DHex1 |  | 1583.6205          | 1583.618           | -1.58               | 0.57      |
| 22.27    | <b>Man5</b>      | Hex5HexNAc2          |  | 1355.5095          | 1355.496           | -9.96               | 7.89      |
| 23.09    | <b>G1</b>        | Hex4HexNAc4          |  | 1599.6154          | 1599.608           | -4.63               | 2.71      |
| 23.39    |                  | Hex4HexNAc4          |                                                                                     | 1599.6154          | 1599.603           | -7.75               | 0.54      |
| 23.70    |                  | Hex4HexNAc4          |                                                                                     | 1599.6154          | 1599.609           | 3.98                | 0.68      |
| 25.17    | <b>Man5Gn</b>    | Hex5HexNAc3          |  | 1558.5888          | 1558.581           | 5.02                | 3.96      |
| 26.01    | <b>G1F</b>       | Hex4HexNAc4<br>DHex1 |  | 1745.6733          | 1745.664           | -5.33               | 1.28      |
| 26.28    | /                | Hex4HexNAc5          |  | 1802.6947          | 1802.703           | -4.58               | 0.38      |

| Milk mAb |                  |                       |                                                                                     |                    |                    |                     |           |
|----------|------------------|-----------------------|-------------------------------------------------------------------------------------|--------------------|--------------------|---------------------|-----------|
| RT (min) | Short name       | Composition           | Structura scheme                                                                    | Expected mass (Da) | Observed mass (Da) | $\Delta$ mass (ppm) | FLR Area% |
| 26.91    | <b>Man6</b>      | Hex6HexNAc2           | 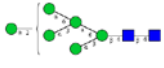   | 1517.5623          | 1517.573           | 7.05                | 6.72      |
| 27.29    |                  | Hex6HexNAc2           |                                                                                     | 1517.5623          | 1517.547           | -10.08              | 2.33      |
| 27.97    | <b>G2</b>        | Hex5HexNAc4           |    | 1761.6682          | 1761.662           | -3.52               | 36.04     |
| 29.07    | /                | Hex6HexNAc3           | /                                                                                   | 1720.6416          | 1720.651           | -5.44               | 1.66      |
| 29.99    | <b>G2F</b>       | Hex5HexNAc4<br>DHex1  |    | 1907.7261          | 1907.703           | -12.11              | 12.95     |
| 30.87    | /                | Hex5HexNAc3<br>NANA   |  | 1849.6842          | 1849.767           | -44.74              | 1.69      |
| 31.31    | <b>Man7</b>      | Hex7HexNAc2           |  | 1679.6151          | 1679.689           | 44.00               | 3.13      |
| 31.63    |                  | Hex7HexNAc2           |                                                                                     | 1679.6151          | 1679.685           | 41.61               | 1.02      |
| 32.02    |                  | Hex7HexNAc2           |                                                                                     | 1679.6151          | 1679.672           | 33.88               | 1.30      |
| 32.92    | <b>G2+NeuAc1</b> | Hex5HexNAc4<br>NeuAc1 |  | 2052.7636          | 2052.782           | 8.96                | 0.90      |
| 33.35    | /                | Hex7HexNAc3           | /                                                                                   | 1882.6954          | 1882.689           | 2.91                | 1.41      |
| 34.13    | /                | Hex6HexNAc3NeuAc1     |  | 2011.7371          | 2011.719           | -9.00               | 1.71      |
| 34.75    |                  |                       |  | 2011.7371          | 2011.724           | 6.49                | 1.95      |

| Milk mAb    |             |                       |                                                                                   |                       |                       |                        |              |
|-------------|-------------|-----------------------|-----------------------------------------------------------------------------------|-----------------------|-----------------------|------------------------|--------------|
| RT<br>(min) | Short name  | Composition           | Structura scheme                                                                  | Expected<br>mass (Da) | Observed<br>mass (Da) | $\Delta$ mass<br>(ppm) | FLR<br>Area% |
| 35.59       | <b>Man8</b> | Hex8HexNAc2           | 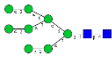 | 1841.6679             | 1841.660              | -4.29                  | 4.82         |
| 36.09       | /           | Hex6HexNAc4Ne<br>uAc1 |  | 2214.8164             | 2214.794              | -10.11                 | 0.29         |
| 36.56       |             |                       |                                                                                   | 2214.8164             | 2214.805              | -5.15                  | 0.27         |

**Table S2. The whole N-glycan profiles of Rituxan.**

| Rituxan  |                           |                           |                                                                                     |                    |                    |             |           |
|----------|---------------------------|---------------------------|-------------------------------------------------------------------------------------|--------------------|--------------------|-------------|-----------|
| RT (min) | Short name                | Composition               | Structura scheme                                                                    | Expected mass (Da) | Observed mass (Da) | Δmass (ppm) | FLR Area% |
| 18.33    | <b>G0F-GlcNAc</b>         | Hex3HexNAc3<br>DHex1      |    | 1380.5411          | 1380.548           | 5.00        | 0.79      |
| 19.07    | <b>G0</b>                 | Hex3HexNAc4               |    | 1437.5625          | 1437.549           | -9.39       | 1.00      |
| 21.50    | <b>G0F</b>                | Hex3HexNAc4<br>DHex1      |    | 1583.6205          | 1583.636           | 9.79        | 43.58     |
| 21.75    |                           | Hex3HexNAc4<br>DHex1      |                                                                                     | 1583.6205          | 1583.632           | 7.26        | 0.50      |
| 22.74    | <b>Man5</b>               | Hex5HexNAc2               |  | 1355.5095          | 1355.512           | 1.84        | 1.27      |
| 23.61    | <b>G1F-GlcNAc</b>         | Hex4HexNAc3<br>DHex1      |  | 1542.5939          | 1542.597           | 2.01        | 1.03      |
| 25.74    | <b>(1,6)G1F</b>           | Hex4HexNAc4<br>DHex1      |  | 1745.6733          | 1745.593           | -46.00      | 30.54     |
| 26.40    | <b>(1,3)G1F</b>           | Hex4HexNAc4<br>DHex1      |  | 1745.6733          | 1745.628           | -25.95      | 10.79     |
| 28.85    | <b>G1F-GlcNAc +NeuAc1</b> | Hex4HexNAc3<br>DHex1NANA1 |  | 1833.6893          | 1833.834           | 78.91       | 0.20      |
| 30.34    | <b>G2F</b>                | Hex5HexNAc4<br>DHex1      |  | 1907.7261          | 1907.715           | -5.82       | 7.71      |

| Rituxan     |                              |                            |                                                                                                                                                                                                                                                                                                                                                                                                                                                                  |                       |                       |                        |              |
|-------------|------------------------------|----------------------------|------------------------------------------------------------------------------------------------------------------------------------------------------------------------------------------------------------------------------------------------------------------------------------------------------------------------------------------------------------------------------------------------------------------------------------------------------------------|-----------------------|-----------------------|------------------------|--------------|
| RT<br>(min) | Short name                   | Composition                | Structura scheme                                                                                                                                                                                                                                                                                                                                                                                                                                                 | Expected<br>mass (Da) | Observed<br>mass (Da) | $\Delta$ mass<br>(ppm) | FLR<br>Area% |
| 32.86       | <b>G2F+</b><br><b>NeuAc1</b> | Hex5HexNAc4<br>DHex1NeuAc1 | 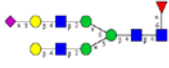 A branched glycan structure with a core fucose (red triangle) attached to a terminal galactose (green circle). The main chain consists of a hexose (purple diamond), a hexose (yellow circle), and a hexose (green circle) linked by alpha-1,6 and alpha-1,3 linkages. A terminal N-acetylglucosamine (blue square) is attached to the second hexose via an alpha-1,2 linkage. | 2198.8215             | 2198.805              | -7.50                  | 1.01         |
| 35.70       | <b>G2F+</b><br><b>NeuAc2</b> | Hex5HexNAc4<br>DHex1NeuAc2 |  A branched glycan structure with a core fucose (red triangle) attached to a terminal galactose (green circle). The main chain consists of a hexose (purple diamond), a hexose (yellow circle), and a hexose (green circle) linked by alpha-1,6 and alpha-1,3 linkages. A terminal N-acetylglucosamine (blue square) is attached to the second hexose via an alpha-1,2 linkage. | 2489.9169             | 2489.917              | 0.04                   | 0.41         |



**Table S3. Data collection and refinement statistics for the anti-CD20 Fc fragment\***

|                                    | Anti-CD20 Fc fragment<br>(PDB: 5IW3) | Anti-CD20 Fc fragment<br>(PDB: 5IW6) |
|------------------------------------|--------------------------------------|--------------------------------------|
| <b>Data collection</b>             |                                      |                                      |
| Wavelength                         | 0.97915                              | 0.97915                              |
| Space group                        | $C222_1$                             | $P2_12_12_1$                         |
| Cell dimensions                    |                                      |                                      |
| a, b, c (Å)                        | 64.16, 143.10, 56.56                 | 49.45, 80.00, 139.32                 |
| $\alpha$ , $\beta$ , $\gamma$ (°)  | 90.0, 90.0, 90.0                     | 90.00, 90.00, 90.00                  |
| Resolution (Å) <sup>†</sup>        | 50.0–2.05 (2.09–2.05)                | 50.0–2.34 (2.38–2.34)                |
| $R_{sym}$ (%)                      | 7.6 (37.2)                           | 8.7 (57.1)                           |
| $I/\sigma$                         | 14.0 (2.9)                           | 32.1 (2.1)                           |
| Completeness (%)                   | 98.1 (82.6)                          | 99.9 (100.0)                         |
| Total No. of reflections           | 132524                               | 677459                               |
| Unique reflections                 | 17005                                | 24182                                |
| Redundancy                         | 3.6 (3.6)                            | 6.8 (6.3)                            |
| <b>Refinement</b>                  |                                      |                                      |
| Resolution (Å)                     | 50.0–2.05 (2.10–2.05)                | 50.0–2.34 (2.40–2.34)                |
| No. of reflections                 | 15767 (1095)                         | 22794 (1606)                         |
| $R_{work}/R_{free}$ (%)            | 18.9/20.7 (24.1/24.3)                | 22.4/25.9 (31.9/32.9)                |
| No. of atoms                       |                                      |                                      |
| Protein                            | 1720                                 | 3379                                 |
| Ligand/ion                         | 23                                   | 0                                    |
| Water                              | 245                                  | 107                                  |
| $B$ -factors (Å <sup>2</sup> )     |                                      |                                      |
| Protein                            | 26.89                                | 60.75                                |
| Ligand/ion                         | 37.30                                | 0                                    |
| Water                              | 40.40                                | 51.22                                |
| RMSDs                              |                                      |                                      |
| Bond lengths (Å)                   | 0.009                                | 0.010                                |
| Bond angles (°)                    | 1.44                                 | 1.47                                 |
| Ramachandran Plot (%) <sup>‡</sup> | 95.0/5.0/0/0                         | 91.8/7.7/0.6/0                       |

\*Three crystallization experiments were performed for each structure. <sup>†</sup>Statistics for the highest resolution shell.

$R_{sym} = \sum_h \sum_i |I_{h,i} - I_h| / \sum_h \sum_i I_{h,i}$ , where  $I_h$  is the mean intensity of the  $i$ th observation of the symmetry-related reflections of  $h$ .

<sup>‡</sup>Residues in the most favoured, additional allowed, generously allowed, and disallowed regions of the Ramachandran plot.

**Table S4. Binding affinity of the recombinant anti-CD20 mAb for human FcγRIIIa.**

|                 | 158Val/Phe | $K_a$ (1/Ms)      | $K_d$ (1/s)          | $K_D$ (M)                     |
|-----------------|------------|-------------------|----------------------|-------------------------------|
| Rituxan         | Val        | $4.6 \times 10^4$ | $4.3 \times 10^{-2}$ | $9.4 \pm 0.02 \times 10^{-7}$ |
| Recombinant mAb | Val        | $1.7 \times 10^5$ | $1.0 \times 10^{-2}$ | $5.9 \pm 0.01 \times 10^{-8}$ |
| Rituxan         | Phe        | $2.5 \times 10^4$ | $1.7 \times 10^{-1}$ | $6.8 \pm 0.02 \times 10^{-6}$ |
| Recombinant mAb | Phe        | $2.1 \times 10^5$ | $2.7 \times 10^{-2}$ | $1.3 \pm 0.02 \times 10^{-7}$ |

**Figure S1**

a

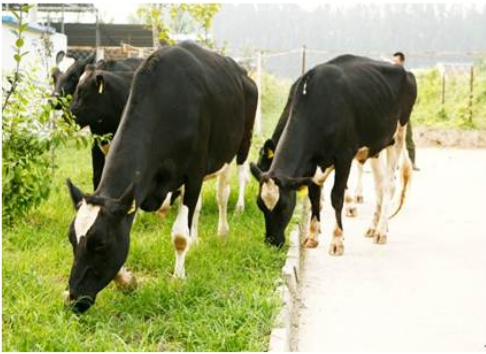

b

Marker 1231 1232 0216 0220 WT

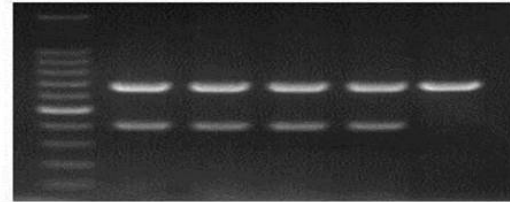

c

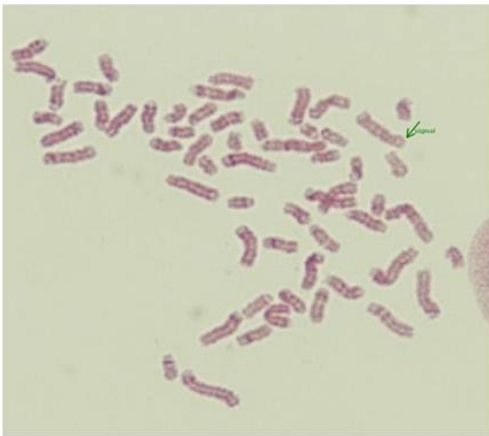

d

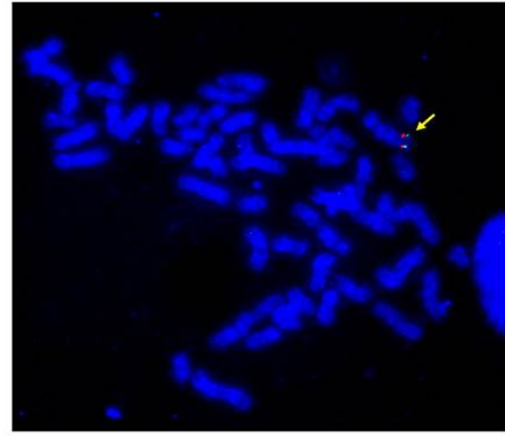

**Figure S2**

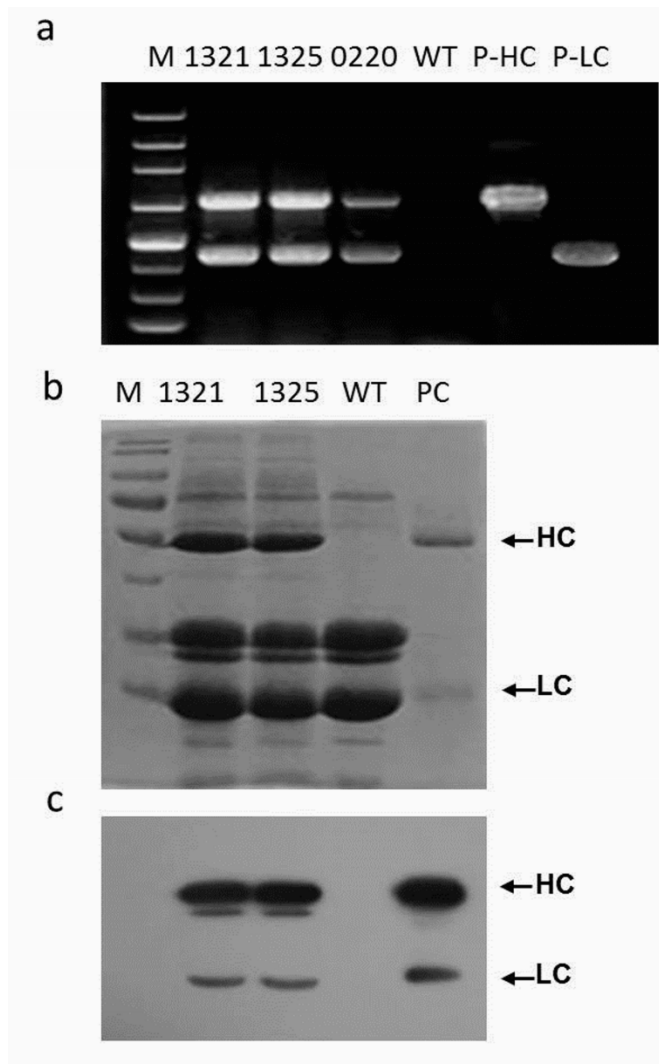

### Figure S3

N-terminus

```
1 QVQLQQPGAE LVKPGASVKM SCKASGYTFT SYNMHWVKQT PGRGLEWIGA
51 IYPGNGDTSY NQKFKGKATL TADKSSSTAY MQLSSLTSED SAVYYCARST
101 YYGGDWYFNV WGAGTTVTVS AASTKGPSVF PLAPSSKSTS GGTAALGCLV
151 KDYFPEPVTV SWNSGALTSG VHTFPAVLQS SGLYSLSSVV TVPSSSLGTQ
201 TYICNVNHKP SNTKVDKKA E PKSCDKTHTC PPCPAPELLG GPSVFLFPPK
----- RVE -----
251 PKDTLMISRT PEVTCVVVDV SHEDPEVKFN WYVDGVEVHN AKTKPREEQY
301 NSTYRVVSVL TVLHQDWLNG KEYKCKVSNK ALPAPIEKTI SKAKGQPREP
351 QVYTLPPSRD ELTKNQVSLT CLVKGFYPSD IAVEWESNGQ PENNYKTTTP
----- E EM -----
401 VLDS DGSFFL YSKLTVDKSR WQQGNVFSCS VMHEALHNHY TQKSLSLSPG
451 K C-terminus
```

**Figure S4**

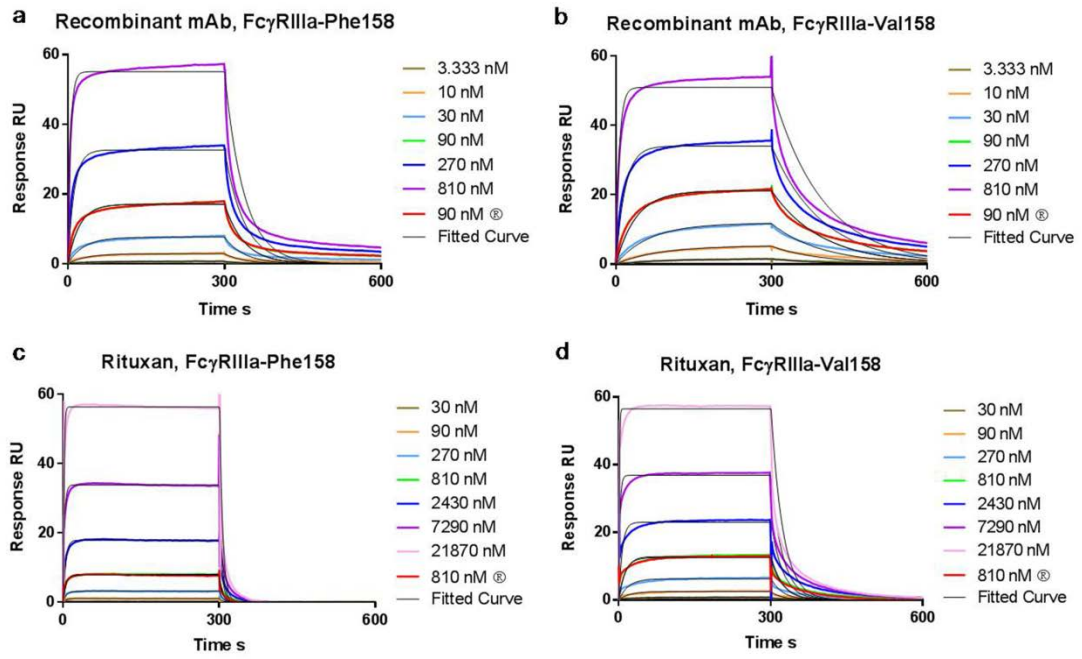

**Full-length gels and blots for SDS-PAGE and Western blotting experiments.**

Figure 1(d)

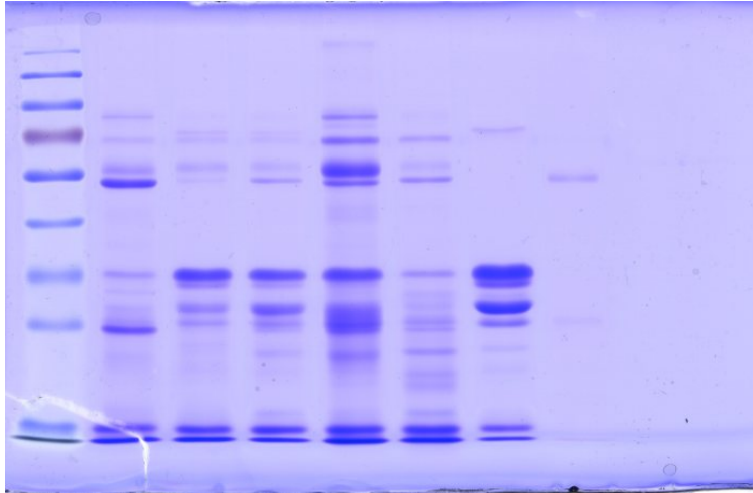

Figure 1(e)

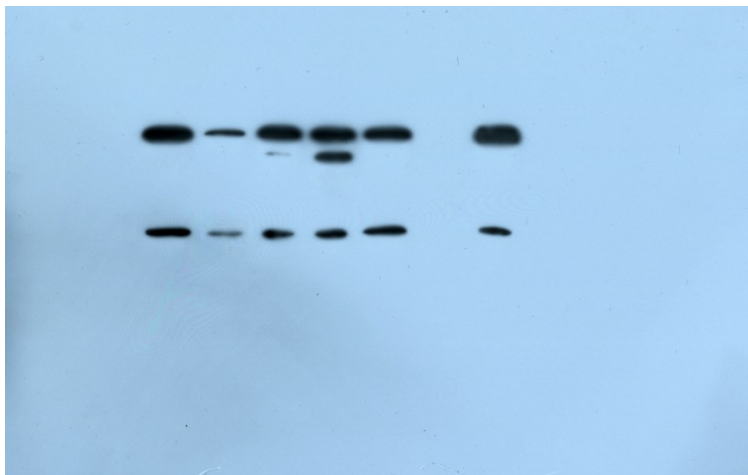

Figure 1(f)

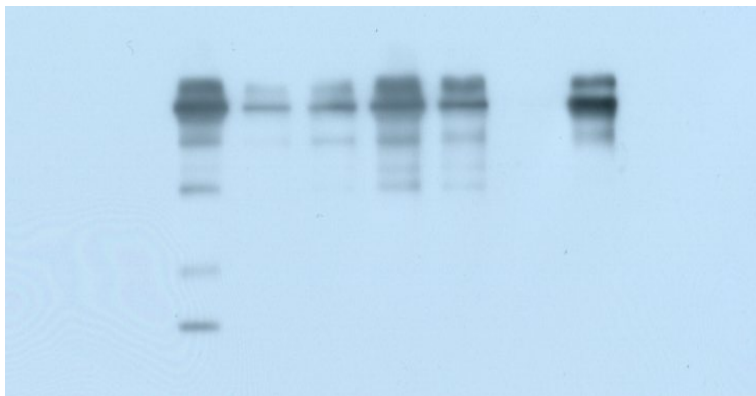

Figure 2(c)

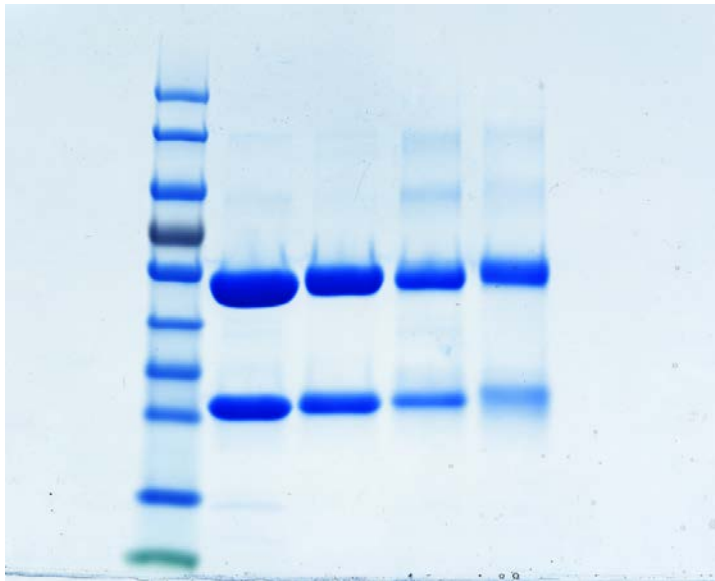

Figure 2(d)

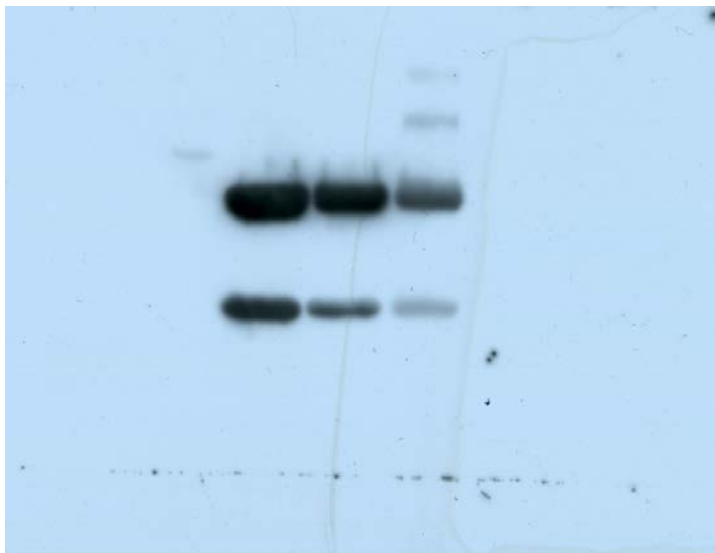

Supplement: 41598_2018_31417_MOESM1_ESM.pdf [file 41598_2018_31417_MOESM1_ESM.pdf]
